# Supplementary material for: High-performance perovskite light-emitting diodes based on double hole transport layers
Source: Royal Society of Chemistry journal article supplement (doi:10.1039/d0tc05669c), 2020-12-29
Supplement: d0tc05669c1.pdf [file d0tc05669c1.pdf]

# **A High-Performance Perovskite Light-Emitting Diodes Based on Double Hole Transport Layers**

Weigao Wang<sup>1, 2</sup>, Zhenghui Wu<sup>2</sup>, Taikang Ye<sup>2</sup>, Shihao Ding<sup>2</sup>, Kai Wang<sup>2, 3</sup>, Zhengchun Peng<sup>1\*</sup>,  
and Xiao Wei Sun<sup>2, 3\*</sup>

*<sup>1</sup>Key Laboratory of Optoelectronic Devices and Systems of Ministry of Education and Guangdong Province, College of Physics and Optoelectronic Engineering, Shenzhen University, Shenzhen, Guangdong, 518060, P. R. China*

*<sup>2</sup>Guangdong University Key Lab for Advanced Quantum Dot Displays and Lighting, Shenzhen Key Laboratory for Advanced Quantum Dot Displays and Lighting, and Department of Electrical and Electronic Engineering, Southern University of Science and Technology, Shenzhen 518055, China*

*<sup>3</sup>Key Laboratory of Energy Conversion and Storage Technologies (Southern University of Science and Technology), Ministry of Education, Shenzhen 518055, China*

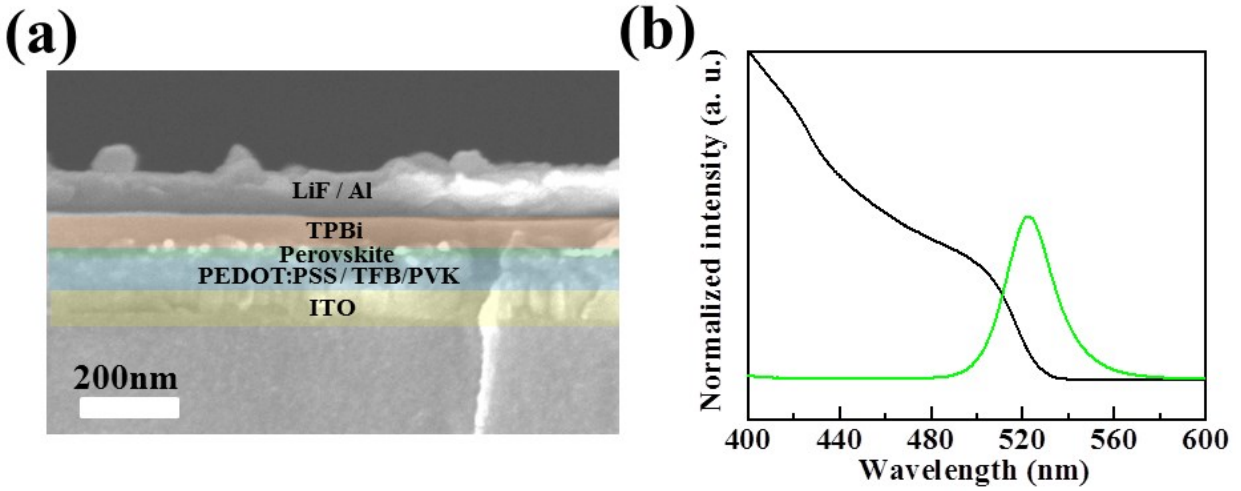

Figure S1. (a) Cross-sectional SEM image of the PeLEDs based on TFB/PVK double hole transport layers. (b) Normalized absorption and PL spectra of  $\text{FAPb}_{0.7}\text{Sn}_{0.3}\text{Br}_3$  NCs.

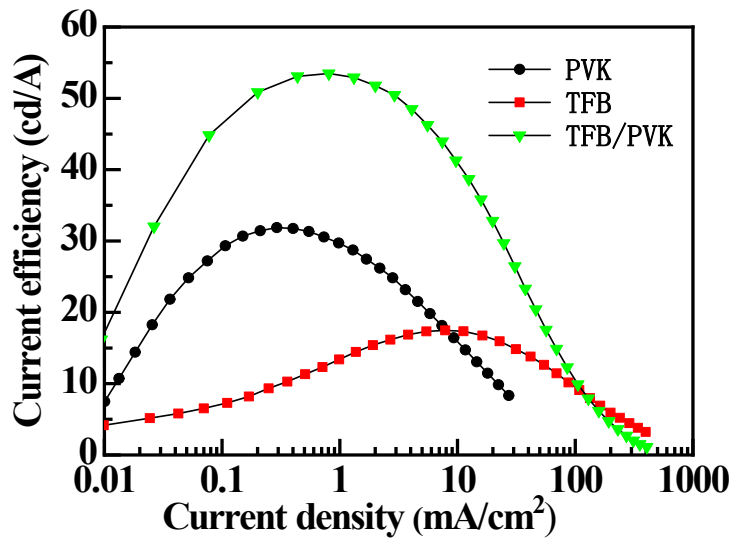

Figure S2. current efficiency -current density characteristics of the PeLEDs with single and double HTLs.

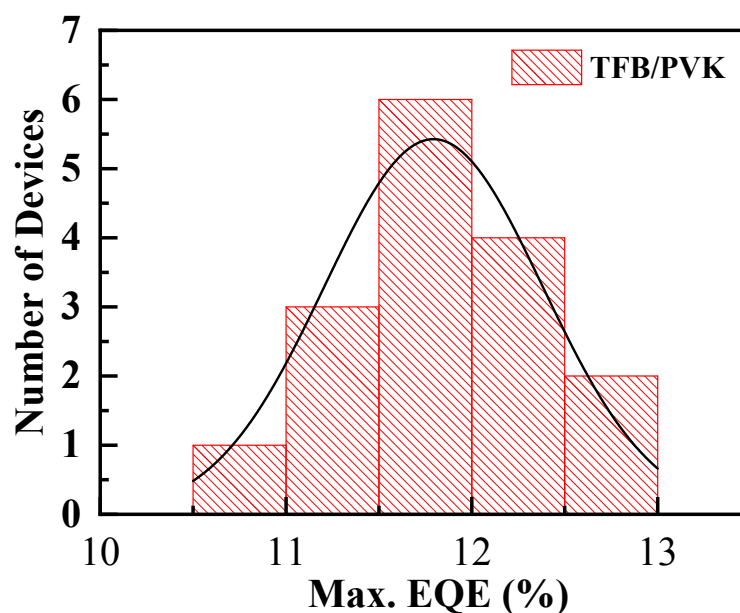

Figure S3. Histogram of the maximum EQEs measured from 16 devices.

Table S1 The PL decay lifetime at 525nm of the samples.

| Sample                                                                         | $\tau_1$ (ns) | A1    | $\tau_2$ (ns) | A2     | $\tau_3$ (ns) | A3     | $\tau_{av}$ (ns) |
|--------------------------------------------------------------------------------|---------------|-------|---------------|--------|---------------|--------|------------------|
| ITO/ FAPb <sub>0.7</sub> Sn <sub>0.3</sub> Br <sub>3</sub>                     | 106.9         | 474.8 | 21.2          | 1788.8 | 3             | 4311   | 61.5             |
| ITO/PEDOT:PSS/PVK/<br>FAPb <sub>0.7</sub> Sn <sub>0.3</sub> Br <sub>3</sub>    | 85.9          | 479.2 | 16            | 1924.6 | 2.1           | 4861   | 49.1             |
| ITO/PEDOT:PSS/TFB/<br>FAPb <sub>0.7</sub> Sn <sub>0.3</sub> Br <sub>3</sub>    | 5.7           | 444.2 | 0.2           | 5049   | 1.2           | 2621.5 | 2.7              |
| ITO/PEDOT:PSS/TFB/PVK<br>FAPb <sub>0.7</sub> Sn <sub>0.3</sub> Br <sub>3</sub> | 20.4          | 289.6 | 3.2           | 1353.3 | 0.5           | 3428   | 11.3             |

Average PL lifetime calculated by the formula of  $\tau_{av} = (A_1 \tau_1^2 + A_2 \tau_2^2 + A_3 \tau_3^2 \dots + A_i \tau_i^2) / (A_1 \tau_1 + A_2 \tau_2 + A_3 \tau_3 \dots + A_i \tau_i)$

Table S2 Device performances of PeLEDs with single and double HTLs.

| <b>Device</b> | <b>V<sub>on</sub> (V)</b> | <b>L<sub>max</sub> (cdm<sup>-2</sup>)</b> | <b>CE<sub>max</sub> (cd A<sup>-1</sup>)</b> | <b>PE<sub>max</sub>(lm W<sup>-1</sup>)</b> | <b>EQE<sub>max</sub>(%)</b> |
|---------------|---------------------------|-------------------------------------------|---------------------------------------------|--------------------------------------------|-----------------------------|
| PVK           | 3.7                       | 2321                                      | 31.9                                        | 18.5                                       | 7.8                         |
| TFB           | 3.05                      | 12960                                     | 17.5                                        | 9.5                                        | 4.3                         |
| TFB/PVK       | 2.92                      | 10520                                     | 53.5                                        | 44.4                                       | 12.9                        |
